# Supplementary material for: Risk of Soil-Transmitted Helminthiasis among Agrarian Communities of Kogi State, Nigeria
Source: PubMed Central journal article supplement (PMC6743035; doi:10.5334/aogh.2563), 2019-09-11

**S1 Table. Supporting information from the asset-based socio-economic status**

| Component Matrix <sup>a</sup> |           |       |       |       |       |       |       |
|-------------------------------|-----------|-------|-------|-------|-------|-------|-------|
|                               | Component |       |       |       |       |       |       |
|                               | 1         | 2     | 3     | 4     | 5     | 6     | 7     |
| have toilet                   | .808      |       |       | .163  | .203  |       | .159  |
| cement                        | .804      |       |       | -.189 | -.304 |       |       |
| mud                           | -.804     |       |       | .189  | .304  |       |       |
| electricity                   | .652      | .311  |       | .226  | -.178 |       |       |
| river                         | -.646     | .461  |       | .118  | .263  |       | .184  |
| have tap water                | .617      | -.510 |       | -.126 | -.181 |       | -.166 |
| leaf                          | -.577     | .358  |       | -.131 | -.435 | -.368 | .170  |
| Pit                           | .561      | -.419 |       | .182  |       |       | .486  |
| radio                         | .517      | .267  |       | .254  | -.199 | -.123 | .177  |
| refrigerator                  | .377      | .600  | -.116 |       | .238  |       | -.180 |
| television                    | .433      | .588  |       | .277  | .131  |       |       |
| rain                          | .192      | .568  | -.125 | -.279 |       | -.255 | -.114 |
| Watercloset                   | .398      | .425  | -.251 | -.370 | .248  | .110  | -.371 |
| Bucket                        | .203      | .118  | .783  | .190  |       |       | -.255 |
| well                          |           | .163  | .758  | .157  | -.233 |       | -.201 |
| Others                        |           | .289  | -.173 | .650  | .144  | -.163 | .103  |
| chicken                       | .159      |       | .415  | -.475 | .102  |       | .459  |
| water                         | .519      | -.499 |       |       | .526  | -.198 | -.231 |
| goat                          | .130      | .177  | .345  | -.326 | .479  |       | .389  |
| toiletpaper                   |           | .173  | -.102 |       | -.194 | .935  |       |

Extraction Method: Principal Component Analysis.

a. 7 components extracted.

**Component Score Coefficient Matrix**

|                | Component |       |       |       |       |       |       |
|----------------|-----------|-------|-------|-------|-------|-------|-------|
|                | 1         | 2     | 3     | 4     | 5     | 6     | 7     |
| mud            | -.253     | -.066 | .016  | .066  | .078  | .002  | -.019 |
| cement         | .253      | .066  | -.016 | -.066 | -.078 | -.002 | .019  |
| electricity    | .168      | .019  | .095  | .207  | -.058 | .002  | -.014 |
| radio          | .167      | -.039 | .020  | .240  | -.094 | -.012 | -.002 |
| television     | .017      | .131  | .098  | .299  | .014  | .101  | .053  |
| refrigerator   | -.026     | .329  | .015  | .083  | .049  | .058  | .031  |
| have tap water | .166      | -.041 | -.007 | -.204 | .119  | -.049 | -.131 |
| river          | -.184     | .050  | -.087 | .218  | -.087 | .032  | .126  |
| well           | .014      | -.040 | .526  | -.033 | -.049 | .042  | -.017 |
| rain           | .059      | .292  | -.027 | -.016 | -.155 | -.173 | .036  |
| have toilet    | .094      | -.004 | -.044 | .184  | .172  | .069  | .123  |
| Pit            | .148      | -.289 | -.167 | .159  | .096  | .077  | .192  |
| Watercloset    | -.028     | .432  | -.058 | -.141 | .100  | .047  | -.031 |
| Bucket         | -.034     | -.001 | .529  | .002  | .063  | -.040 | .014  |
| Others         | -.041     | -.061 | -.028 | .470  | .023  | -.065 | -.123 |
| toiletpaper    | -.009     | -.018 | .004  | -.056 | .021  | .787  | -.019 |
| water          | -.065     | .029  | .010  | .000  | .387  | -.271 | -.008 |
| leaf           | .067      | -.030 | -.013 | .005  | -.412 | -.209 | .013  |
| goat           | -.088     | .033  | -.007 | .008  | .070  | .022  | .560  |
| chicken        | .047      | -.052 | .021  | -.116 | -.097 | -.037 | .548  |

Extraction Method: Principal Component Analysis.

Rotation Method: Oblimin with Kaiser Normalization.

Component Scores.

| <b>Statistics</b>                  |         |            |
|------------------------------------|---------|------------|
| REGR factor score 1 for analysis 1 |         |            |
| N                                  | Valid   | 295        |
|                                    | Missing | 0          |
| Mean                               |         | 0E-7       |
| Std. Error of Mean                 |         | .05822225  |
| Median                             |         | -.0641089  |
| Std. Deviation                     |         | 1.0000000  |
| Variance                           |         | 1.000      |
| Minimum                            |         | -1.61857   |
| Maximum                            |         | 1.71463    |
| Percentiles                        | 20      | -1.0724367 |
|                                    | 25      | -.9104205  |
|                                    | 40      | -.4875375  |
|                                    | 50      | -.0641089  |
|                                    | 60      | .3660927   |
|                                    | 75      | .9864561   |
|                                    | 80      | 1.0723084  |

| REGR factor score 1 for analysis 1 |          |           |         |               |                    |
|------------------------------------|----------|-----------|---------|---------------|--------------------|
|                                    |          | Frequency | Percent | Valid Percent | Cumulative Percent |
| Valid                              | -1.61857 | 3         | 1.0     | 1.0           | 1.0                |
|                                    | -1.52452 | 2         | .7      | .7            | 1.7                |
|                                    | -1.51844 | 2         | .7      | .7            | 2.4                |
|                                    | -1.51818 | 1         | .3      | .3            | 2.7                |
|                                    | -1.47948 | 1         | .3      | .3            | 3.1                |
|                                    | -1.44246 | 5         | 1.7     | 1.7           | 4.7                |
|                                    | -1.42440 | 1         | .3      | .3            | 5.1                |
|                                    | -1.34842 | 1         | .3      | .3            | 5.4                |
|                                    | -1.34258 | 3         | 1.0     | 1.0           | 6.4                |
|                                    | -1.34234 | 3         | 1.0     | 1.0           | 7.5                |
|                                    | -1.30362 | 6         | 2.0     | 2.0           | 9.5                |
|                                    | -1.24854 | 12        | 4.1     | 4.1           | 13.6               |
|                                    | -1.24830 | 1         | .3      | .3            | 13.9               |
|                                    | -1.18684 | 1         | .3      | .3            | 14.2               |
|                                    | -1.18345 | 1         | .3      | .3            | 14.6               |
|                                    | -1.16648 | 4         | 1.4     | 1.4           | 15.9               |
|                                    | -1.15632 | 1         | .3      | .3            | 16.3               |
|                                    | -1.14768 | 1         | .3      | .3            | 16.6               |
|                                    | -1.11126 | 1         | .3      | .3            | 16.9               |
|                                    | -1.10595 | 1         | .3      | .3            | 17.3               |
|                                    | -1.10459 | 5         | 1.7     | 1.7           | 19.0               |
|                                    | -1.07244 | 7         | 2.4     | 2.4           | 21.4               |
|                                    | -1.03347 | 2         | .7      | .7            | 22.0               |
|                                    | -1.01138 | 2         | .7      | .7            | 22.7               |
|                                    | -1.01054 | 1         | .3      | .3            | 23.1               |
|                                    | -1.00471 | 1         | .3      | .3            | 23.4               |
|                                    | -.97635  | 1         | .3      | .3            | 23.7               |
|                                    | -.96619  | 1         | .3      | .3            | 24.1               |
|                                    | -.92459  | 1         | .3      | .3            | 24.4               |
|                                    | -.91042  | 2         | .7      | .7            | 25.1               |
|                                    | -.90652  | 1         | .3      | .3            | 25.4               |
|                                    | -.84558  | 3         | 1.0     | 1.0           | 26.4               |
| -.82861                            | 2        | .7        | .7      | 27.1          |                    |
| -.82738                            | 1        | .3        | .3      | 27.5          |                    |
| -.82511                            | 2        | .7        | .7      | 28.1          |                    |
| -.81993                            | 1        | .3        | .3      | 28.5          |                    |
| -.81864                            | 1        | .3        | .3      | 28.8          |                    |
| -.76352                            | 2        | .7        | .7      | 29.5          |                    |
| -.74305                            | 9        | 3.1       | 3.1     | 32.5          |                    |

|         |   |     |     |      |
|---------|---|-----|-----|------|
| -73456  | 7 | 2.4 | 2.4 | 34.9 |
| -.67544 | 1 | .3  | .3  | 35.3 |
| -.66947 | 1 | .3  | .3  | 35.6 |
| -.64317 | 1 | .3  | .3  | 35.9 |
| -.64278 | 2 | .7  | .7  | 36.6 |
| -.60697 | 1 | .3  | .3  | 36.9 |
| -.58671 | 1 | .3  | .3  | 37.3 |
| -.58128 | 1 | .3  | .3  | 37.6 |
| -.57946 | 1 | .3  | .3  | 38.0 |
| -.55140 | 2 | .7  | .7  | 38.6 |
| -.52728 | 1 | .3  | .3  | 39.0 |
| -.51292 | 2 | .7  | .7  | 39.7 |
| -.48754 | 3 | 1.0 | 1.0 | 40.7 |
| -.48724 | 2 | .7  | .7  | 41.4 |
| -.46707 | 1 | .3  | .3  | 41.7 |
| -.44857 | 1 | .3  | .3  | 42.0 |
| -.44827 | 1 | .3  | .3  | 42.4 |
| -.43086 | 1 | .3  | .3  | 42.7 |
| -.40518 | 2 | .7  | .7  | 43.4 |
| -.40128 | 1 | .3  | .3  | 43.7 |
| -.38711 | 1 | .3  | .3  | 44.1 |
| -.37303 | 1 | .3  | .3  | 44.4 |
| -.33682 | 1 | .3  | .3  | 44.7 |
| -.30723 | 3 | 1.0 | 1.0 | 45.8 |
| -.30530 | 3 | 1.0 | 1.0 | 46.8 |
| -.28873 | 1 | .3  | .3  | 47.1 |
| -.23221 | 1 | .3  | .3  | 47.5 |
| -.22518 | 1 | .3  | .3  | 47.8 |
| -.17505 | 1 | .3  | .3  | 48.1 |
| -.14617 | 2 | .7  | .7  | 48.8 |
| -.12920 | 1 | .3  | .3  | 49.2 |
| -.08979 | 1 | .3  | .3  | 49.5 |
| -.07743 | 1 | .3  | .3  | 49.8 |
| -.06411 | 1 | .3  | .3  | 50.2 |
| -.06084 | 1 | .3  | .3  | 50.5 |
| -.05788 | 1 | .3  | .3  | 50.8 |
| -.03596 | 1 | .3  | .3  | 51.2 |
| -.03570 | 1 | .3  | .3  | 51.5 |
| .03064  | 1 | .3  | .3  | 51.9 |
| .03384  | 1 | .3  | .3  | 52.2 |
| .03648  | 1 | .3  | .3  | 52.5 |
| .03845  | 1 | .3  | .3  | 52.9 |

|        |   |     |     |      |
|--------|---|-----|-----|------|
| .10094 | 1 | .3  | .3  | 53.2 |
| .11270 | 1 | .3  | .3  | 53.6 |
| .11913 | 1 | .3  | .3  | 53.9 |
| .14243 | 1 | .3  | .3  | 54.2 |
| .18649 | 2 | .7  | .7  | 54.9 |
| .19283 | 2 | .7  | .7  | 55.6 |
| .21133 | 2 | .7  | .7  | 56.3 |
| .22196 | 1 | .3  | .3  | 56.6 |
| .26615 | 1 | .3  | .3  | 56.9 |
| .27767 | 1 | .3  | .3  | 57.3 |
| .28687 | 3 | 1.0 | 1.0 | 58.3 |
| .30537 | 1 | .3  | .3  | 58.6 |
| .30592 | 1 | .3  | .3  | 59.0 |
| .36259 | 3 | 1.0 | 1.0 | 60.0 |
| .36843 | 1 | .3  | .3  | 60.3 |
| .37171 | 2 | .7  | .7  | 61.0 |
| .42808 | 1 | .3  | .3  | 61.4 |
| .44201 | 1 | .3  | .3  | 61.7 |
| .47233 | 1 | .3  | .3  | 62.0 |
| .48147 | 1 | .3  | .3  | 62.4 |
| .52406 | 1 | .3  | .3  | 62.7 |
| .54453 | 3 | 1.0 | 1.0 | 63.7 |
| .59568 | 1 | .3  | .3  | 64.1 |
| .61032 | 3 | 1.0 | 1.0 | 65.1 |
| .62040 | 1 | .3  | .3  | 65.4 |
| .62882 | 1 | .3  | .3  | 65.8 |
| .64651 | 1 | .3  | .3  | 66.1 |
| .64977 | 1 | .3  | .3  | 66.4 |
| .70437 | 1 | .3  | .3  | 66.8 |
| .72894 | 1 | .3  | .3  | 67.1 |
| .78642 | 2 | .7  | .7  | 67.8 |
| .79165 | 3 | 1.0 | 1.0 | 68.8 |
| .79374 | 2 | .7  | .7  | 69.5 |
| .82539 | 1 | .3  | .3  | 69.8 |
| .86543 | 1 | .3  | .3  | 70.2 |
| .87177 | 1 | .3  | .3  | 70.5 |
| .88047 | 3 | 1.0 | 1.0 | 71.5 |
| .89828 | 1 | .3  | .3  | 71.9 |
| .90231 | 1 | .3  | .3  | 72.2 |
| .91398 | 4 | 1.4 | 1.4 | 73.6 |
| .94749 | 2 | .7  | .7  | 74.2 |
| .97645 | 2 | .7  | .7  | 74.9 |

|         |     |       |       |       |
|---------|-----|-------|-------|-------|
| .98646  | 1   | .3    | .3    | 75.3  |
| 1.00244 | 3   | 1.0   | 1.0   | 76.3  |
| 1.00478 | 1   | .3    | .3    | 76.6  |
| 1.04154 | 3   | 1.0   | 1.0   | 77.6  |
| 1.04224 | 4   | 1.4   | 1.4   | 79.0  |
| 1.04762 | 1   | .3    | .3    | 79.3  |
| 1.04787 | 2   | .7    | .7    | 80.0  |
| 1.07842 | 1   | .3    | .3    | 80.3  |
| 1.08121 | 1   | .3    | .3    | 80.7  |
| 1.08450 | 1   | .3    | .3    | 81.0  |
| 1.12103 | 1   | .3    | .3    | 81.4  |
| 1.12430 | 1   | .3    | .3    | 81.7  |
| 1.12749 | 2   | .7    | .7    | 82.4  |
| 1.14142 | 2   | .7    | .7    | 83.1  |
| 1.14192 | 3   | 1.0   | 1.0   | 84.1  |
| 1.15645 | 1   | .3    | .3    | 84.4  |
| 1.16326 | 1   | .3    | .3    | 84.7  |
| 1.18696 | 1   | .3    | .3    | 85.1  |
| 1.18931 | 1   | .3    | .3    | 85.4  |
| 1.19290 | 1   | .3    | .3    | 85.8  |
| 1.21834 | 2   | .7    | .7    | 86.4  |
| 1.22347 | 2   | .7    | .7    | 87.1  |
| 1.31981 | 1   | .3    | .3    | 87.5  |
| 1.38331 | 10  | 3.4   | 3.4   | 90.8  |
| 1.38954 | 1   | .3    | .3    | 91.2  |
| 1.39118 | 1   | .3    | .3    | 91.5  |
| 1.40187 | 1   | .3    | .3    | 91.9  |
| 1.42228 | 4   | 1.4   | 1.4   | 93.2  |
| 1.46537 | 2   | .7    | .7    | 93.9  |
| 1.50433 | 5   | 1.7   | 1.7   | 95.6  |
| 1.52240 | 1   | .3    | .3    | 95.9  |
| 1.55941 | 4   | 1.4   | 1.4   | 97.3  |
| 1.56549 | 2   | .7    | .7    | 98.0  |
| 1.59838 | 3   | 1.0   | 1.0   | 99.0  |
| 1.60446 | 2   | .7    | .7    | 99.7  |
| 1.71463 | 1   | .3    | .3    | 100.0 |
| Total   | 295 | 100.0 | 100.0 |       |

Histogram

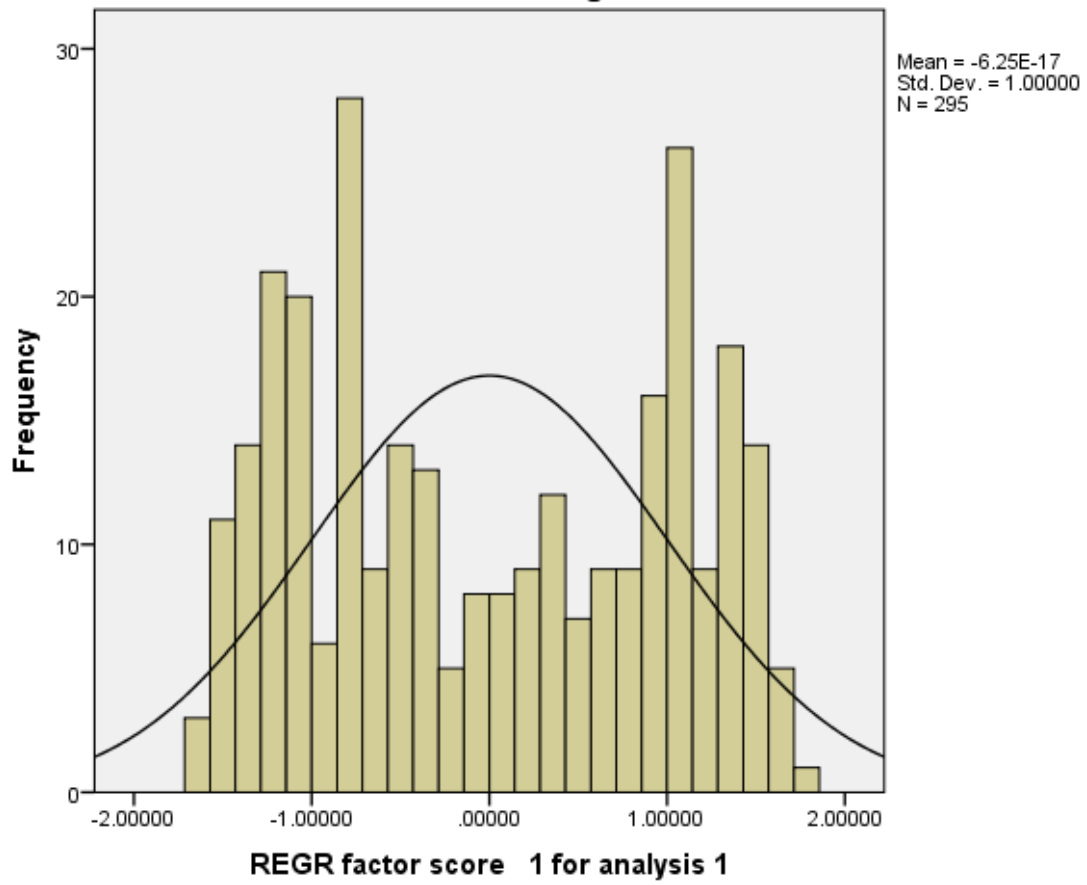

Supplement: agh-85-1-2563-s1.pdf [file agh-85-1-2563-s1.pdf]
